# Supplementary material
Source: MDPI journal article supplement (https://www.mdpi.com/2673-6004/5/1/9)
Supplement: s1 [file s1]

**Table S1.** Data used in the experimental study to examine whether zebra finch females can assess male quality through olfaction.

| Focal bird | Choice | Side | Pair |
|------------|--------|------|------|
| 24         | 1      | 0    | 1    |
| 25         | 1      | 1    | 1    |
| 9          | 0      | 0    | 2    |
| 12         | 0      | 1    | 2    |
| 19         | 1      | 0    | 3    |
| 28         | 1      | 1    | 3    |
| 8          | 0      | 0    | 4    |
| 14         | 0      | 1    | 4    |
| 10         | 0      | 1    | 5    |
| 16         | 1      | 0    | 5    |
| 2          | 1      | 1    | 6    |
| 26         | 0      | 0    | 6    |
| 4          | 0      | 1    | 7    |
| 17         | 0      | 0    | 7    |
| 1          | 1      | 1    | 8    |
| 21         | 0      | 0    | 8    |
| 7          | 0      | 1    | 9    |
| 13         | 0      | 0    | 9    |
| 3          | 0      | 1    | 10   |
| 23         | 0      | 0    | 10   |
| 5          | 0      | 0    | 11   |
| 18         | 0      | 1    | 11   |
| 11         | 0      | 0    | 12   |
| 15         | 1      | 1    | 12   |
| 20         | 0      | 1    | 13   |
| 27         | 0      | 0    | 13   |
| 6          | 0      | 1    | 14   |
| 22         | 0      | 0    | 14   |
